# Supplementary material for: Diffusible signal factor (DSF)-mediated quorum sensing modulates expression of diverse traits in Xanthomonas citri and responses of citrus plants to promote disease
Source: BMC Genomics. 2019 Jan 17;20:55. doi: 10.1186/s12864-018-5384-4 (PMC6337780; doi:10.1186/s12864-018-5384-4)
Supplement: Supplementary file 5 — Table S5. Comparison of the in vitro and in planta DSF/Rpf-mediated QS regulons of Xanthomonas citri subsp. citri (XLSX 29 kb) [file 12864_2018_5384_MOESM5_ESM.xlsx]

## Sheet: Sheet1
Table S5. Comparison of the in vitro and in planta DSF/Rpf-mediated QS regulons of Xanthomonas citri subsp. citri
		log2FoldChange
	Locus tag	rpfF/ Wt Exa	rpff/ Wt Sta	rpfF/ Wt in planta	Gene	Product description	JCVIb
	XAC4326	-2.52	-2.94	-6.5	uahA	urea amidolyase	Unclassified
	XAC4327	-2.41	-3.56	-5.92	uahA	allophanate hydrolase	Energy metabolism
	XAC2992	-2.54	-2.58	-2.98	-	endoproteinase Arg-C	Protein synthesis
	XAC1879	-5.66	-5.56	-2.67	rpfF	enoyl-CoA hydratase	Unclassified
	XAC2763	-2.32	NS	-2.01	-	extracellular protease	Protein fate
	XAC3513	NS	-1.2	-1.79	-	hypothetical protein	Not in JCVI
	XAC0612	-4.58	-3.09	-1.53	engXCA	cellulase	Energy metabolism
	XAC3921	-1.01	NS	-1.52	ugt	glucosyltransferase	Cell envelope
	XAC3769	-2.82	NS	-1.49	nucA	endonuclease precursor	Transcription
	XAC2151	-4.6	-1.79	-1.47	yapH	YapH protein	Protein fate
	XAC3922	-1.15	NS	-1.42	entF	ATP-dependent serine activating enzyme	Regulatory functions
	XAC1034	-2.06	-1.11	-1.38	-	peptidyl-Asp metalloendopeptidase	Not in JCVI
	XAC0465	-3	-1.2	-1.37	-	metalloproteinase	Protein fate
	XAC0029	-3.32	-4.52	-1.34	egl	cellulase	Energy metabolism
	XAC1926	-2.43	-2.55	-1.34	-	hypothetical protein	Not in JCVI
	XAC3533	-1.63	-1.74	-1.23	-	hypothetical protein	Not in JCVI
	XAC1512	NS	-1.2	-1.19	-	serine peptidase	Protein fate
	XAC3745	NS	-1.08	-1.17	-	hypothetical protein	Not in JCVI
	XAC1927	-2.51	-2.65	-1.14	aslB	Fe-S oxidoreductase	Energy metabolism
	XAC4182	-2.88	-1.99	-1.13	-	cytochrome C biogenesis protein	Protein fate
	XAC2027	NS	-1.12	-1.09	-	hypothetical protein	Not in JCVI
	XAC1210	NS	-1.25	-1.07	-	hypothetical protein	Not in JCVI
	XAC1328	NS	-1.17	-1.07	-	hypothetical protein	Regulatory functions
	XAC1211	NS	-1.51	-1	katE	catalase	Cellular processes
	XAC1778	-1.18	-1.06	-0.98	-	sensor kinase	Not in JCVI
	XAC0540	-1.9	-1.09	-0.86	-	ribonuclease	Protein fate
	XAC1427	-1.36	NS	-0.84	pru	protein U	Cell envelope
	XAC3017	-1.21	-1.08	-0.83	rebB	RebB protein	Unclassified
	XAC1021	-1.39	-1.59	-0.82	-	hypothetical protein	Hypothetical proteins
	XAC1907	-1.11	NS	-0.81	parA	chromosome partioning protein	Cellular processes
	XAC3776	NS	-1.1	-0.81	-	hypothetical protein	Hypothetical proteins
	XAC0028	-2.51	NS	-0.79	egl	cellulase	Energy metabolism
	XAC3746	NS	-1.05	-0.77	-	hypothetical protein	Not in JCVI
	XAC1178	NS	-1.95	-0.75	-	oxidoreductase	Cellular processes
	XAC1928	-1.32	-1.49	-0.73	-	hypothetical protein	Not in JCVI
	XAC3738	NS	-1.16	-0.73	-	oxidoreductase	Central intermediary metabolism
	XAC3726	NS	-1.56	-0.72	-	hypothetical protein	Unclassified
	XAC0067	-1.66	-1.47	-0.71	mdpB	microcystin dependent protein	Unclassified
	XAC2336	NS	1.72	-0.69	cydA	cytochrome D ubiquinol oxidase subunit I	Energy metabolism
	XAC2536	NS	-1.03	-0.67	-	hypothetical protein	Unclassified
	XAC3273	-1.05	-1.38	-0.66	-	histidine kinase-response regulator	Regulatory functions
	XAC3219	-1.77	-2.18	-0.64	-	hypothetical protein	Not in JCVI
	XAC3747	NS	-1.29	-0.64	ybdR	Zn-dependent alcohol dehydrogenase	Energy metabolism
	XAC2250	NS	-1.19	-0.61	-	hypothetical protein	Not in JCVI
	XAC0066	-1.76	-1.46	-0.59	-	microcystin dependent protein	Unclassified
	XAC1177	NS	-1.79	-0.59	-	hypothetical protein	Unclassified
	XAC3240	-1.44	NS	-0.59	fimA	fimbrillin	Cell envelope
	XAC3725	NS	-1.22	-0.59	-	hypothetical protein	Mobile and extrachromosomal element functions
	XAC1986	NS	2.03	-0.56	flgB	flagellar basal body rod protein FlgB	Cellular processes
	XAC0065	-1.6	NS	-0.55	-	microcystin dependent protein	Unclassified
	XAC4091	-1.66	-1.22	-0.51	-	hypothetical protein	Not in JCVI
	XAC1894	-1.37	NS	-0.48	tsr	chemotaxis protein	Cellular processes
	XAC0064	-1.39	NS	-0.47	-	acetyltransferase	Cellular processes
	XAC2026	NS	-1.2	-0.45	-	hypothetical protein	Not in JCVI
	XAC2986	-1.19	NS	-0.44	pelB	pectate lyase II	Energy metabolism
	XAC3868	-2.47	-2.21	-0.42	yliI	dehydrogenase	Unclassified
	XAC0611	-1.04	NS	-0.41	tsr	chemotaxis protein	Cellular processes
	XAC2028	NS	-1.11	-0.41	fdh	glutathione-dependent formaldehyde dehydrogenase	Energy metabolism
	XAC2853	-2.99	-4.2	-0.41	-	cysteine protease	Unclassified
	XAC2887	NS	1.26	-0.41	-	hypothetical protein	Not in JCVI
	XAC1909	-1		-0.39	motC	Flagellar motor protein	Cellular processes
	XAC3763	-1.33	NS	-0.39	-	hypothetical protein	Hypothetical proteins
	XAC1398	NS	1.17	-0.38	-	hypothetical protein	Regulatory functions
	XAC3727	NS	-1.24	-0.37	-	hypothetical protein	Not in JCVI
	XAC3014	-1.62	-1.47	-0.35	rebB	RebB protein	Unclassified
	XAC3562	-1.22	NS	-0.35	pel	pectate lyase	Energy metabolism
	XAC0086	NS	1.06	-0.29	-	hypothetical protein	Not in JCVI
	XAC3314	-1.75	NS	-0.29	-	hypothetical protein	Unknown function
	XAC0061	NS	–1.38	-0.28	peh-1	Endopolygalacturonase	Cellular processes
	XAC1996	-1.7	NS	-0.26	mcp	chemotaxis protein	Cellular processes
	XAC2447	-1.3	NS	-0.26	cheW	chemotaxis protein	Cellular processes
	XAC1987	-1.44	NS	-0.25	cheV	chemotaxis protein	Cellular processes
	XAC3018	-1.17	-1.13	-0.25	-	hypothetical protein	Not in JCVI
	XAC1953	-1.24	-1.45	-0.24	fliG	flagellar protein	Cellular processes
	XAC3015	-1.31	-1.22	-0.24	rebB	RebB protein	Unclassified
	XAC2788	NS	-1.08	-0.22	-	hypothetical protein	Unclassified
	XAC1971	-1.21	NS	-0.21	-	hypothetical protein	Not in JCVI
	XAC0435	NS	-2.14	-0.18	virK	VirK protein	Unclassified
	XAC1452	-2.11	NS	-0.18	-	hypothetical protein	Not in JCVI
	XAC2268	-1.23	NS	-0.18	-	hypothetical protein	Not in JCVI
	XACb0028	NS	-1.08	-0.17	-	-	Not in JCVI
	XAC2787	NS	-1.6	-0.16	-	hypothetical protein	Not in JCVI
	XAC2868	-1.44	NS	-0.16	vieA	response regulator	Regulatory functions
	XAC1897	-1.59	NS	-0.14	tsr	chemotaxis protein	Cellular processes
	XAC1949	-1.49	-1.52	-0.14	fliK	flagellar protein	Cellular processes
	XAC0446	-1	NS	-0.11	pdhA	pyruvate dehydrogenase E1 alpha subunit	Energy metabolism
	XAC1954	-1.05	NS	-0.11	fliF	flagellar MS-ring protein	Cellular processes
	XAC1995	-1.07	NS	-0.11	-	hypothetical protein	Not in JCVI
	XAC3132	-1.55	NS	-0.11	mcp	chemotaxis protein	Cellular processes
	XAC3170	NS	-1.05	-0.11	bioI	cytochrome P-450 hydroxylase	Unclassified
	XAC0798	-1.21	NS	-0.09	amy	alpha-amylase	Energy metabolism
	XAC1890	-1.43	NS	-0.09	cheR	chemotaxis protein methyltransferase	DNA metabolism
	XAC1895	-1.56	NS	-0.09	tsr	chemotaxis protein	Cellular processes
	XAC1952	-1.24	-1.36	-0.09	fliH	flagellar protein	Cellular processes
	XAC2448	-2.09	NS	-0.09	mcp	chemotaxis protein	Cellular processes
	XAC1908	NS	1.54	-0.08	motB	flagellar motor protein MotD	Cellular processes
	XAC2832	-1.44	NS	-0.08	-	hypothetical protein	Unclassified
	XAC1634	-1.08	NS	-0.05	-	hypothetical protein	Not in JCVI
	XAC1896	-1.12	NS	-0.04	tsr	chemotaxis protein	Cellular processes
	XAC2864	-2.16	NS	-0.01	-	hypothetical protein	Transport and binding proteins
	XAC1902	-1.51	NS	-0.001	tsr	chemotaxis protein	Cellular processes
	XAC1988	NS	1.55	0.02	flgA	flagellar basal body P-ring biosynthesis protein FlgA	Cellular processes
	XAC1974	-1.53	NS	0.04	fliD	flagellar protein	Cellular processes
	XAC3213	-1.39	NS	0.04	mcp1	chemotaxis protein	Cellular processes
	XAC0802	NS	-1.21	0.06	-	sulfotransferase	Amino acid biosynthesis
	XAC1891	-1.29	NS	0.06	tsr	chemotaxis protein	Cellular processes
	XAC1899	-1.52	NS	0.06	tsr	chemotaxis protein	Cellular processes
	XAC3915	NS	-1.06	0.06	radC	DNA repair protein RadC	DNA metabolism
	XAC1208	NS	-1.12	0.07	-	hypothetical protein	Hypothetical proteins
	XAC1287	-1.42	NS	0.08	galM	aldose 1-epimerase	Energy metabolism
	XAC2786	NS	-2.14	0.08	-	hypothetical protein	Not in JCVI
	XAC2483	NS	1.42	0.09	-	hypothetical protein	Unknown function
	XAC2867	-1.62	NS	0.09	cheW	chemotaxis protein	Cellular processes
	XAC3787	-1.56	-1.4	0.09	-	hypothetical protein	Not in JCVI
	XAC1893	-1.7	NS	0.11	tsr	chemotaxis protein	Cellular processes
	XAC1905	-1.43	NS	0.11	-	hypothetical protein	Hypothetical proteins
	XAC2831	-1.62	NS	0.11	-	extracellular serine protease	Protein fate
	XAC3019	-1.1	NS	0.11	-	hypothetical protein	Unclassified
	XAC1975	-1.79	NS	0.12	fliC	flagellin	Energy metabolism
	XAC1903	-1.33	NS	0.16	cheA	chemotaxis protein	Cellular processes
	XAC1941	NS	1.17	0.16	fliR	flagellar biosynthetic protein	Cellular processes
	XAC3715	NS	-1.12	0.17	-	hypothetical protein	Not in JCVI
	XAC1951	-1.3	-1.46	0.18	fliI	flagellar protein	Cellular processes
	XAC1955	NS	1.94	0.19	fliE	flagellar protein	Cellular processes
	XAC2866	-2.1	NS	0.19	mcp	chemotaxis protein	Cellular processes
	XAC0543	-1.19	-2.8	0.21	-	hypothetical protein	Not in JCVI
	XAC1900	-1.26	NS	0.21	tsr	chemotaxis protein	Cellular processes
	XAC4252	NS	-1.12	0.21	xynB	xylanase	Energy metabolism
	XAC1171	NS	-1.13	0.22	stkXac1	serine/threonine kinase	Regulatory functions
	XAC1266	NS	-1.06	0.22	hrpXct	HrpX protein	Unclassified
	XAC1950	-1.58	-1.83	0.23	fliJ	flagellar FliJ protein	Cellular processes
	XAC1973	-1.81	NS	0.23	fliS	flagellar protein	Cellular processes
	XAC3354	NS	2.03	0.26	ompW	outer membrane protein W	Cell envelope
	XAC2922	NS	-1.32	0.28	hrpW	HrpW protein	Cell envelope
	XAC3016	-1.36	-1.3	0.28	rebA	RebA protein	Unclassified
	XACb0011	NS	-1.21	0.28	avrXacE3	-	Not in JCVI
	XAC1942	NS	2.07	0.29	fliQ	flagellar biosynthesis	Cellular processes
	XAC1285	-3.31	NS	0.31	lamA	endo-1,3-beta-glucanase	Energy metabolism
	XAC3522	1.97	1.77	0.33	-	hypothetical protein	Not in JCVI
	XAC0346	-2	-2.42	0.35	-	degenerated cellulase	Unclassified
	XAC4333	NS	-1.02	0.35	-	hypothetical protein	Unclassified
	XAC1972	-1.21	NS	0.37	-	hypothetical protein	Not in JCVI
	XAC1976	-2.44	NS	0.39	flgL	flagellar hook-associated protein FlgL	Cellular processes
	XAC1906	-1.13	NS	0.41	cheW	chemotaxis protein	Unclassified
	XAC1969	-1.21	-1.07	0.41	rpoN	RNA polymerase sigma-54 factor	Transcription
	XAC2398	NS	1.32	0.42	-	hypothetical protein	Unknown function
	XAC0661	-1.07	-1.38	0.43	peh-1	endopolygalacturonase	Cell envelope
	XAC0933	-1.14	NS	0.44	-	truncated xylanase	Central intermediary metabolism
	XAC4199	NS	-1.46	0.46	-	polyvinylalcohol dehydrogenase	Unclassified
	XAC0934	-1.32	NS	0.48	-	truncated xylanase	Central intermediary metabolism
	XAC2370	NS	-1.42	0.48	-	hypothetical protein	Not in JCVI
	XAC1932	-1.55	NS	0.49	cheY	chemotaxis protein	Cellular processes
	XAC0330	-1.22	NS	0.51	cmfA	conditioned medium factor	Unclassified
	XAC1904	-1.54	NS	0.52	cheY	chemotaxis response regulator	Cellular processes
	XAC4026	-1.74	NS	0.52	-	hypothetical protein	Not in JCVI
	XAC0817	-1.23	-1.26	0.53	-	hypothetical protein	Not in JCVI
	XAC1982	-1.32	NS	0.53	flgF	flagellar basal body rod protein FlgF	Cellular processes
	XAC2374	NS	-1.03	0.57	pglA	polygalacturonase	Cell envelope
	XAC4321	-1.08	NS	0.58	-	hypothetical protein	Not in JCVI
	XAC1937	NS	1.32	0.61	flhB	flagellar biosynthesis protein FlhB	Cellular processes
	XAC4029	-1.35	NS	0.61	catB	catalase precursor	Cellular processes
	XAC1931	-1.57	NS	0.63	cheZ	chemotaxis related protein	Cellular processes
	XAC1948	NS	2.16	0.71	fliL	flagellar protein	Cellular processes
	XAC3040	NS	-1.16	0.71	metA	homoserine O-acetyltransferase	Amino acid biosynthesis
	XAC1983	-1.64	NS	0.73	flgE	flagellar hook protein FlgE	Cellular processes
	XAC3523	2	1.88	0.73	-	hypothetical protein	Not in JCVI
	XAC0076	NS	-1.07	0.75	avrBs2	avirulence protein	Cellular processes
	XAC2865	-1.5	NS	0.76	cheA	chemotaxis histidine protein kinase	Cellular processes
	XAC3524	2.54	2.01	0.77	-	hypothetical protein	Cell envelope
	XAC1930	-1.3	NS	0.81	cheA	chemotaxis related protein	Cellular processes
	XAC1910	-1.03	NS	0.83	cirA	TonB-dependent receptor	Transport and binding proteins
	XAC2600	-1.09	NS	0.83	btuB	TonB-dependent receptor	Transport and binding proteins
	XAC2830	-1.15	NS	0.93	fhuA	TonB-dependent receptor	Transport and binding proteins
	XAC4030	-1.68	NS	0.98	catB	catalase	Not in JCVI
	XAC3085	NS	-1.03	1.06	-	hypothetical protein	Not in JCVI
	XAC3525	2.65	2.47	1.11	-	hypothetical protein	Not in JCVI
	XAC3856	NS	-1.49	1.19	-	hypothetical protein	Transport and binding proteins
	XAC3506	-1.47	NS	1.67	-	truncated cellulase S	Not in JCVI
	XAC1812	NS	1.33	1.72	hmsF	HmsF protein	Regulatory functions
	XAC3507	-2.03	NS	1.99	celS	truncated cellulase S	Energy metabolism
	XAC1813	NS	1.29	2.06	hmsH	HmsH protein	Cell envelope
a Log2-fold change was derived from the mutant verse the wild type strain. Ex, the exponential growth phase; St, the stationary growth phase; NS = not significantly differentially expressed (|log2-fold change| < 1 ).
b J. Craig Venter Institute (JCVI) functional categories.
